# Supplementary material for: Alterations in proliferation of neuronal stem cells in Attention-Deficit/Hyperactivity Disorder and Wnt modulation by methylphenidate
Source: Research Square preprint supplement (doi:10.21203/rs.3.rs-3956813/v1), 2025-02-14
Supplement: Supplementary file 1 [file 8c80567e661f3a2bc93a7b32.pdf]

**Alterations in proliferation of neuronal stem cells in Attention-  
Deficit/Hyperactivity Disorder and Wnt modulation by methylphenidate**

Cristine Marie Yde Ohki, Ph.D.<sup>1</sup>, Natalie Monet Walter, M.Sc.<sup>1</sup>, Lukasz Smigielski, Ph.D.<sup>1</sup>,  
Audrey Bender, M.Sc.<sup>1</sup>, Michelle Rickli, M.Sc.<sup>1</sup>, Susanne Walitza, Prof. Dr. MD MSc<sup>1,2,3</sup>,  
Edna Grünblatt, Prof. Ph.D.<sup>\*1,2,3</sup>

<sup>1</sup> Department of Child and Adolescent Psychiatry and Psychotherapy, Translational Molecular Psychiatry,  
University Hospital of Psychiatry Zurich, University of Zurich, Wagistrasse 12, 8952, Schlieren, Switzerland

<sup>2</sup> Neuroscience Center Zurich, University of Zurich and the ETH Zurich, Winterthurerstrasse 11, 8057, Zurich,  
Switzerland

<sup>3</sup> Zurich Center for Integrative Human Physiology, University of Zurich, Winterthurerstrasse 11, 8057, Zurich,  
Switzerland

**\*Correspondence:**

Edna Grünblatt

Head of Translational Molecular Psychiatry

Chair of ECNP TWG iPSC Platform for Neuropsychiatry

Department of Child and Adolescent Psychiatry and Psychotherapy

University Hospital of Psychiatry Zurich University of Zurich (UZH)

Wagistrasse 12; CH-8952 Schlieren/ Switzerland

E-mail: edna.gruenblatt@kjpd.uzh.ch

This file contains Supplementary Figures 1 – 6 and Supplementary Tables 1, 2 and 3 from the  
manuscript from Yde Ohki et al. Supplementary Tables 4 and 5 are individually attached.

## Supplementary Information

A.

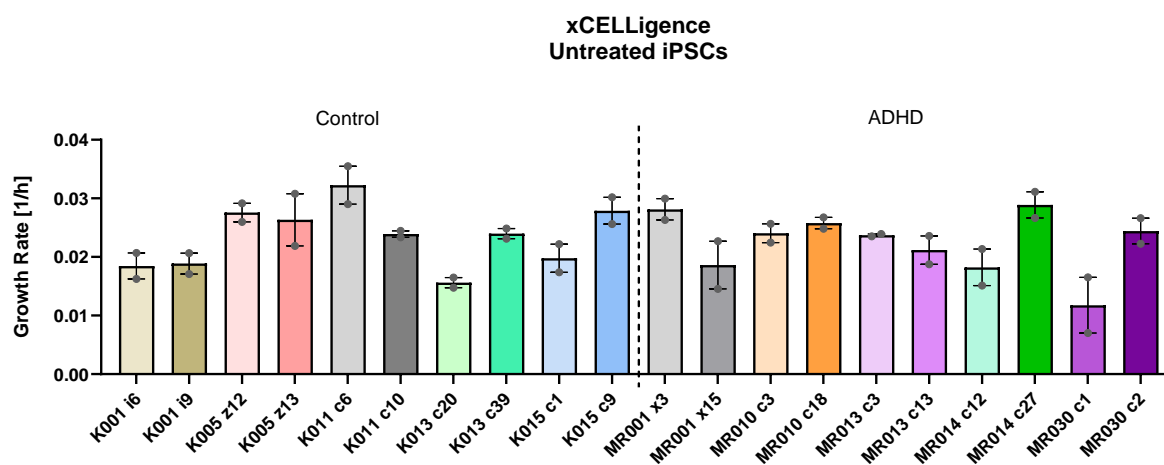

B.

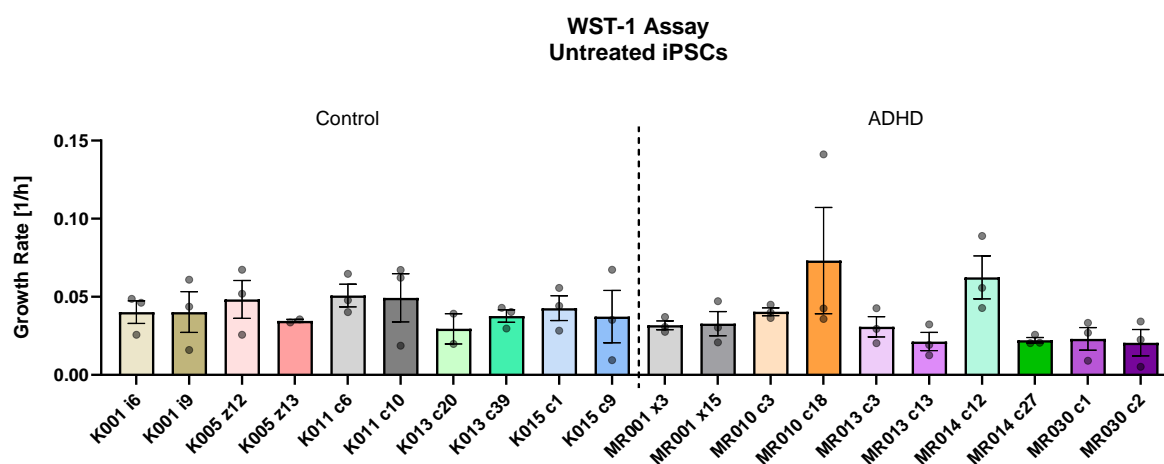

**Supplementary Fig. 1: Growth rates from all iPSC lines included in this study at baseline.** Growth rates derived from xCELLigence experiments (A) and WST-1 assays (B) are shown in the graphs. Mean  $\pm$  SEM for each cell line is depicted, while each dot represents one technical replicate. At least 2 technical replicates were considered to calculate individual means in this analysis.

36

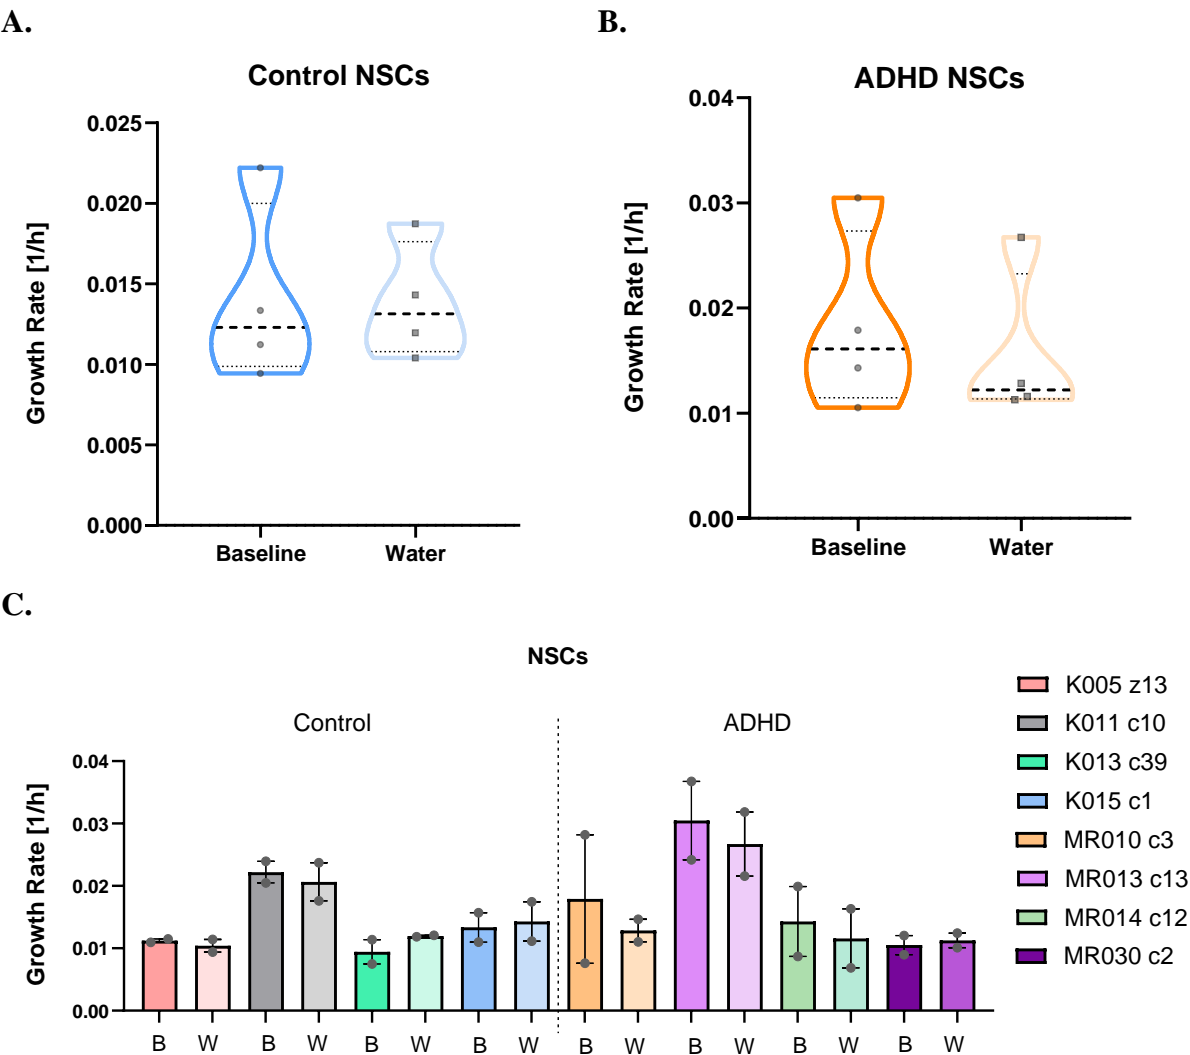

**Supplementary Fig. 2: Growth rates from NSC lines cultured as baseline or with water as vehicle treatment.** Growth rates derived from xCELLigence experiments in control (A) and ADHD (B) NSCs are shown in the graphs. For both groups, no differences are seen between the conditions (Mann-Whitney, n.s.). C) Growth rates from individual cell lines in these two conditions. B= Baseline condition; W = Water condition. Mean  $\pm$  SEM for each cell line is depicted, while each dot represents one technical replicate. N=4 Control individuals (1 clone each) and 4 ADHD patients (1 clone each) were analyzed in 2 technical replicates.

44

45

A.

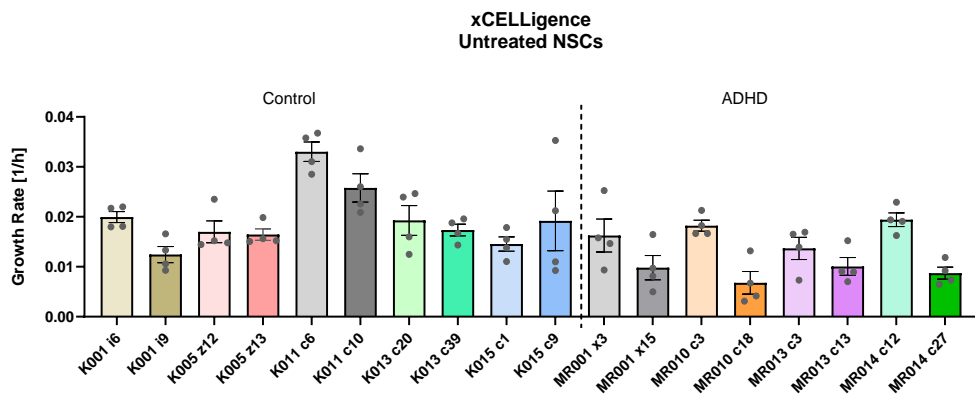

B.

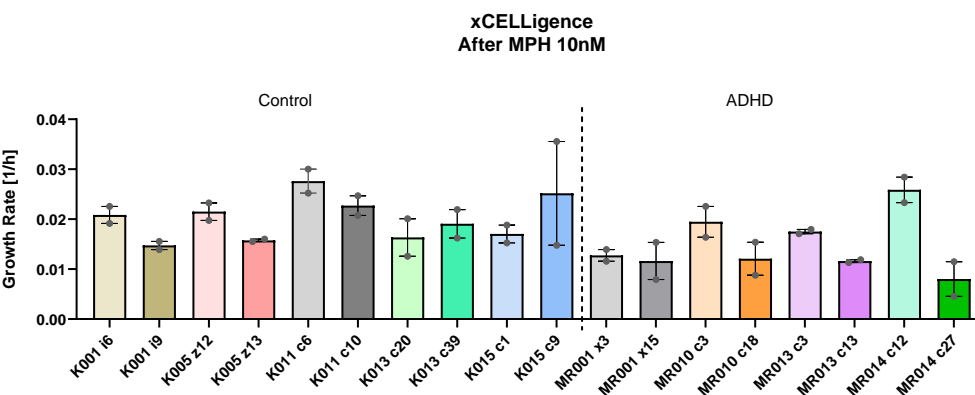

C.

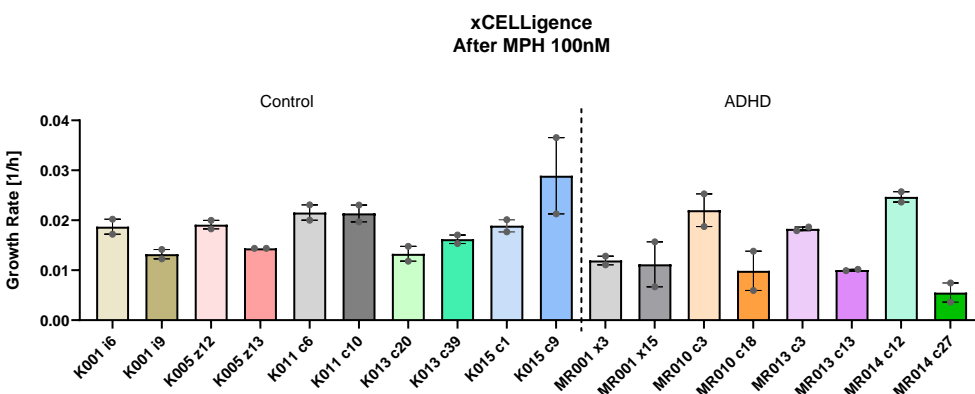

**Supplementary Fig. 3: Growth rates of all the NSC lines analyzed in xCELLigence.** The graphs depict growth rates for individual NSC lines at baseline (A) and after chronic treatment with MPH 10 nM (B) and 100 nM (C). For the vehicle condition, four experiments per cell line were considered. Mean  $\pm$  SEM for each cell line is depicted, while each dot represents one technical replicate. N=2 technical replicates were performed for each cell line.

53

A.

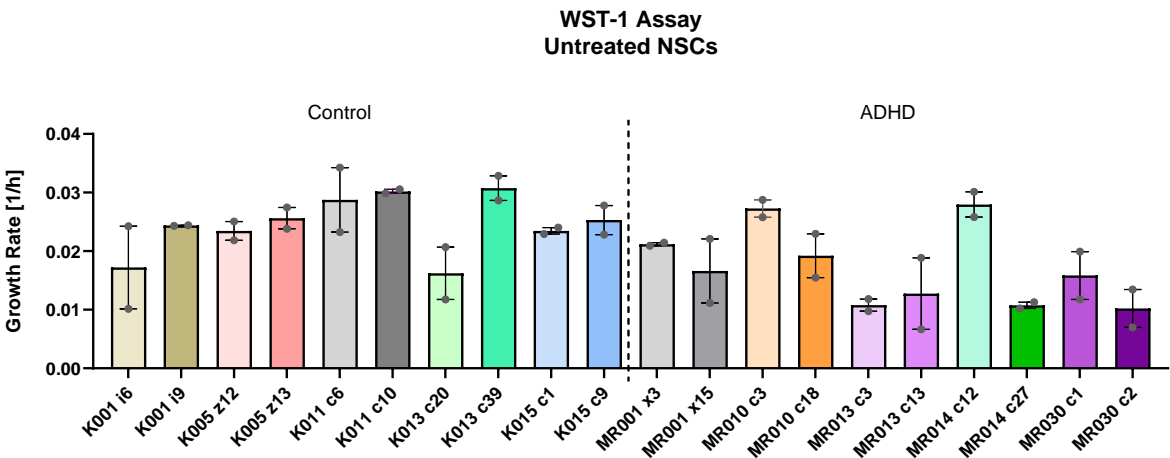

B.

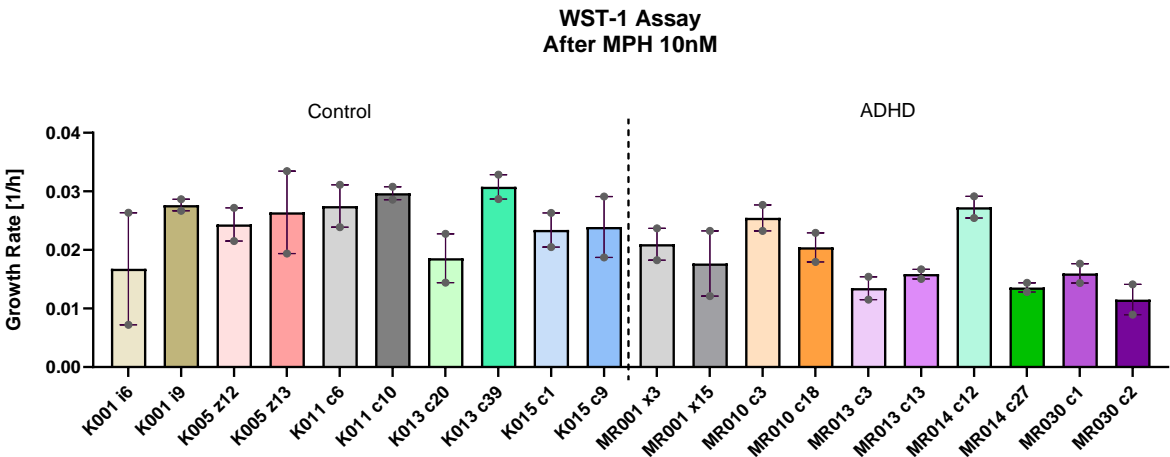

C.

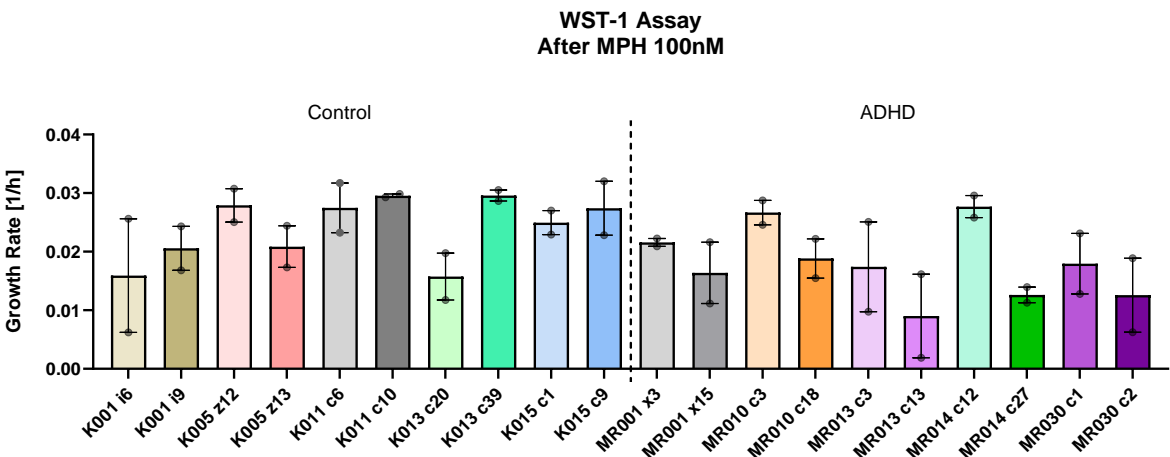

**Supplementary Fig. 4: Growth rates of all the NSC lines analyzed in WST-1 assays.** The graphs depict growth rates for individual NSC lines at baseline (A) and after chronic treatment with MPH 10nM (B) and 100nM (C). Mean  $\pm$  SEM for each cell line is depicted, while each dot represents one technical replicate. N=2 technical replicates were performed for each cell line.

60

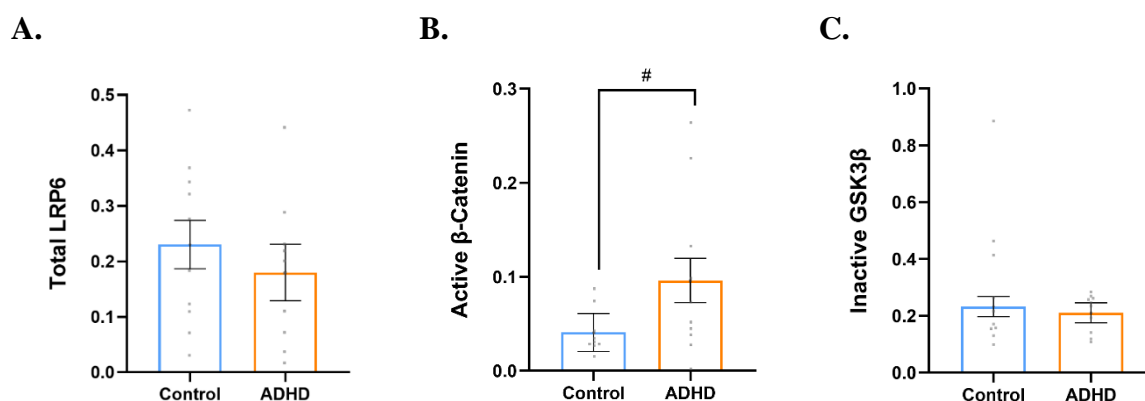

61

62 **Supplementary Fig. 5: Protein expression of Wnt-related proteins between control and ADHD NSCs**  
 63 **at baseline after 7-day culture: Total LRP6 (A), active β-catenin (B) and inactive GSK3β (C).** No  
 64 statistical differences were seen for any of the proteins. A trend toward significance was observed for active  
 65 β-catenin ( $^{\#}p = 0.068$ ). Mean  $\pm$  SEM (model-adjusted, standard *lmer* for total LRP6 and active β-catenin;  
 66 robust *lmer* for inactive GSK3β) is depicted, while each dot represents the averaged raw data from 2  
 67 experiments per cell line. N=2 technical replicates were performed for each cell line.

68

69

A.

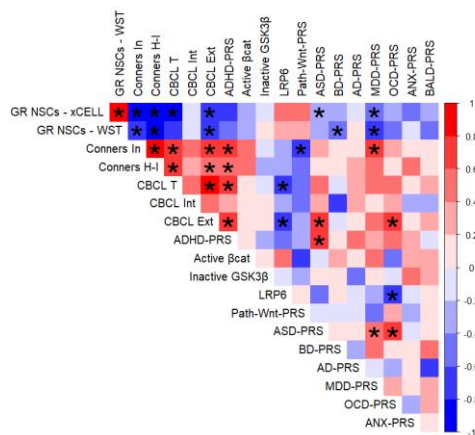

B.

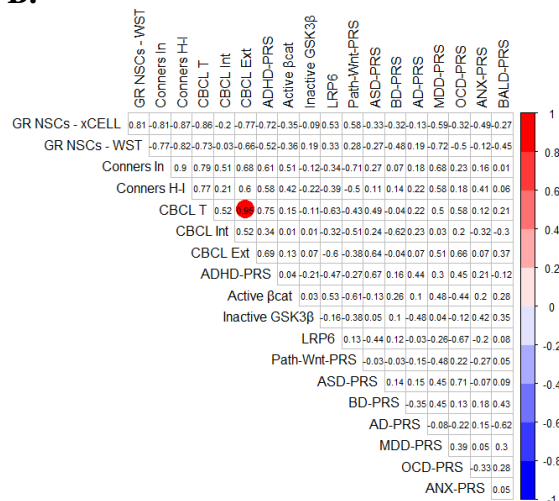

**Supplementary Fig. 6: Correlations between ADHD-related behavioral scores, Wnt-PRS, PRS for ADHD and other disorders and *in vitro* findings when results from two iPSC clones were averaged.** A) Uncorrected pairwise comparisons after averaging *in vitro* findings of two clones derived from the same donor. As in Fig. 5A, Spearman's correlations were conducted in this analysis while colors code the strength and direction of each correlation. Asterisks indicate statistically significant correlations without any corrections applied ( $p < 0.05$ ). B) Correlation coefficients after Bonferroni corrections are shown. After a conservative Bonferroni's correction for 171 unique pair combinations, 1 pair survived the correction ( $0.05/171$ , in red,  $p < 0.05$ ): CBCL T versus CBCL Ext. The red color indicate the positive correlation whereas 0.95 represents the correlation coefficient. Abbreviations: GR NSCs – xCELL: Growth rates of NSCs from xCELLigence assays; GR NSCs – WST: Growth rates of NSCs from WST-1 assays; Conners In = Inattention scores from Conners' Rating Scales; Conners H-I: Hyperactivity/Impulsivity scores from Conners' Rating Scales; CBCL T = Total Scores from CBCL; CBCL Int = Internalizing scores from CBCL; CBCL Ext = Externalizing scores from CBCL; Active  $\beta$ cat = Protein expression of active  $\beta$ -catenin after a 7-day cell culture; Inactive GSK3 $\beta$  = Protein expression of inactive GSK3 $\beta$  after a 7-day cell culture; LRP6 = Protein expression of LRP6 after a 7-day cell culture; ADHD-PRS = Polygenic Risk Scores for Attention-Deficit Hyperactivity Disorder; Path-Wnt-PRS = Pathway-PRS specific to Wnt signaling; ASD-PRS = Polygenic Risk Scores for Autism Spectrum Disorder; BD-PRS = Polygenic Risk Scores for Bipolar Disorder; AD-PRS = Polygenic Risk Scores for Alzheimer's Disease; MDD-PRS = Polygenic Risk Scores for Major Depressive Disorder; OCD-PRS = Polygenic Risk Scores for Obsessive-Compulsive Disorder; ANX-PRS = Polygenic Risk Scores for Anxiety Disorder. Genetic variables and clinical scores were also present in a previous publication<sup>27</sup>.

**Supplementary Table 1: Demographic and clinical information about subjects analyzed in this study.**

| Cell line | Clones analyzed in this study | Cell type of origin | Diagnosis       | Age | Sex    | ADHD-PRS (z-score) | IQ  | Conners |     | CBCL  |     |     |
|-----------|-------------------------------|---------------------|-----------------|-----|--------|--------------------|-----|---------|-----|-------|-----|-----|
|           |                               |                     |                 |     |        |                    |     | I       | H/I | Total | Ext | Int |
| K001      | i6 & i9                       | Keratinocytes       | Healthy control | 15  | Male   | 0.46               | 118 | 57      | 50  | 54    | 51  | 55  |
| K005      | z12 & z13                     | Keratinocytes       | Healthy control | 16  | Male   | -0.52              | 113 | 53      | 48  | 48    | 45  | 53  |
| K011      | c6 & c10                      | Keratinocytes       | Healthy control | 16  | Male   | -1.03              | 124 | 39      | 48  | 43    | 34  | 51  |
| K013      | c20 & c20                     | PBMCs               | Healthy control | 9   | Female | -0.08              | 127 | 43      | 47  | 52    | 53  | 53  |
| K015      | c1 & c9                       | PBMCs               | Healthy control | 13  | Male   | -1.66              | 127 | 30      | 38  | 39    | 40  | 49  |
| MR001     | x3 & x15                      | Keratinocytes       | ADHD            | 15  | Male   | -0.67              | 121 | 73      | 69  | 63    | 60  | 61  |
| MR010     | c3 & c18                      | Keratinocytes       | ADHD            | 9   | Male   | 1.63               | 133 | 73      | 69  | 63    | 60  | 61  |
| MR013     | c3 & c13                      | PBMCs               | ADHD            | 16  | Male   | 0.29               | 109 | 73      | 73  | 53    | 50  | 49  |
| MR014     | c12 & c27                     | PBMCs               | ADHD            | 13  | Male   | 0.45               | 98  | 73      | 58  | 59    | 57  | 57  |
| MR030     | c1 & c2                       | PBMCs               | ADHD            | 9   | Female | 1.13               | 143 | 66      | 69  | 68    | 74  | 50  |

Individual ADHD-PRS were calculated using Demontis et al. 2023<sup>31</sup> and a threshold of  $p=0.05$  was adopted. T-values from Conners' Rating Scales and Child Behavior Checklist (CBCL) scores are represented. Abbreviations: I = Inattention; H/I = Hyperactivity/Impulsivity; Total = Total scale scores; Ext = Externalizing scale scores; Int = Internalizing scale scores.



102 **Supplementary Table 2: Primary and secondary antibodies for Western Blot**

| Type of Antibody   | Primary Antibodies                                | Product  | Company                   | Species | Dilution | Size    |
|--------------------|---------------------------------------------------|----------|---------------------------|---------|----------|---------|
| Primary Antibody   | Anti- $\beta$ -Catenin non-phosphorylated, active | D13A1    | Cell Signaling Technology | Rabbit  | 1: 1000  | 92 kDa  |
|                    | Anti-GSK3 $\beta$                                 | ab32391  | Abcam                     | Rabbit  | 1: 5000  | 46 kDa  |
|                    | Anti-GSK3 $\beta$ Phospho S9                      | ab75814  | Abcam                     | Rabbit  | 1: 5000  | 47 kDa  |
|                    | Anti-LRP6                                         | ab134146 | Abcam                     | Rabbit  | 1: 500   | 180 kDa |
|                    | Anti-GAPDH loading control                        | ab8245   | Abcam                     | Mouse   | 1: 2000  | 40 kDa  |
| Secondary Antibody | Goat Anti-Rabbit IgG (HRP)                        | ab7090   | Abcam                     | Goat    | 1:10000  | N/A     |
|                    | Donkey Anti-Mouse IgG(HRP)                        | ab7061   | Abcam                     | Donkey  | 1:10000  | N/A     |

103

104

**Supplementary Table 3: Statistics from the *posthoc* tests applied in this study.**

| Experiment                                                                  | Figure | Comparison                                       | Est.  | SE   | t- or z-ratio | df    | p-value      |
|-----------------------------------------------------------------------------|--------|--------------------------------------------------|-------|------|---------------|-------|--------------|
| NSC Proliferation after MPH treatment using xCELLigence assays              | 2B     | ADHD Vehicle <i>versus</i> Control Vehicle       | -0.37 | 0.13 | -2.89         | 14.00 | <b>0.012</b> |
|                                                                             |        | ADHD MPH 10 nM <i>versus</i> Control MPH 10 nM   | -0.29 | 0.13 | -2.23         | 14.00 | <b>0.043</b> |
|                                                                             |        | ADHD MPH 100 nM <i>versus</i> Control MPH 100 nM | -0.27 | 0.13 | -2.10         | 14.00 | <i>0.055</i> |
| NSC Proliferation after MPH treatment using WST-1 assays                    | 2C     | ADHD Vehicle <i>versus</i> Control Vehicle       | -0.30 | 0.11 | -2.80         | 9.54  | <b>0.020</b> |
|                                                                             |        | ADHD MPH 10 nM <i>versus</i> Control MPH 10 nM   | -0.27 | 0.11 | -2.57         | 9.54  | <b>0.029</b> |
|                                                                             |        | ADHD MPH 100 nM <i>versus</i> Control MPH 100 nM | -0.24 | 0.11 | -2.29         | 9.54  | <b>0.046</b> |
| NSC Proliferation after MPH and/or DKK1 treatments using xCELLigence assays | 3B     | ADHD Vehicle <i>versus</i> Control Vehicle       | -0.36 | 0.17 | -2.16         | 12.60 | <i>0.051</i> |
|                                                                             |        | ADHD MPH 10 nM <i>versus</i> Control MPH 10 nM   | -0.28 | 0.17 | -1.65         | 12.60 | 0.124        |
|                                                                             |        | ADHD DKK1 <i>versus</i> Control DKK1             | -0.29 | 0.17 | 0.11          | 12.60 | 0.110        |
|                                                                             |        | ADHD DKK1 + MPH <i>versus</i> Control DKK1 + MPH | -0.33 | 0.17 | -1.96         | 12.60 | <i>0.073</i> |

Statistically significant p-values ( $p < 0.05$ ) are highlighted in **bold**, while trends toward significance ( $0.05 < p < 0.075$ ) are written in *italic*.

110 **Supplementary Table 4: Pair of all correlations considering clones individually (N=20),**  
111 **as well as their respective correlation coefficients and p-values.**

112 See file attached as supplementary material.

113

114 **Supplementary Table 5: Pair of all correlations after averaging results from clones**  
115 **(N=10), as well as their respective correlation coefficients and p-values.**

116 See file attached as supplementary material.

117

118
